# Supplementary material
Source: Springer Nature journal article supplement (https://www.springermedizin.de/resource/supplementary/12985_2009_781_MOESM3_ESM.pdf/9609148)

# A. Positive strand HCV RNA

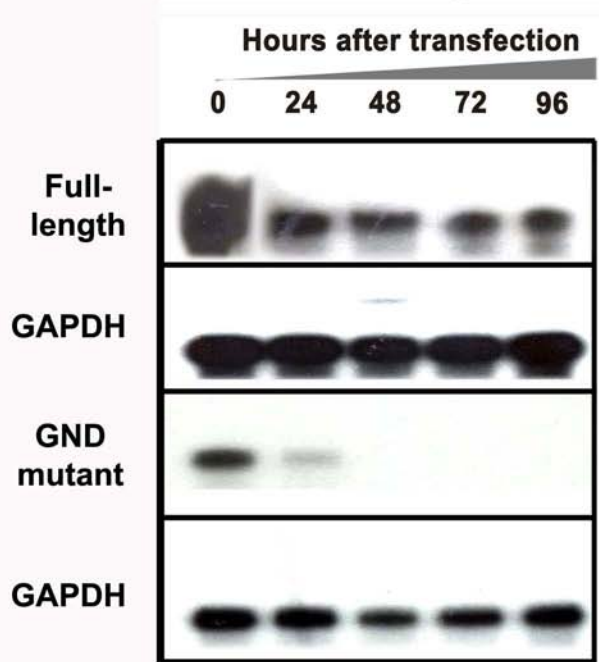

# B. Negative strand HCV RNA

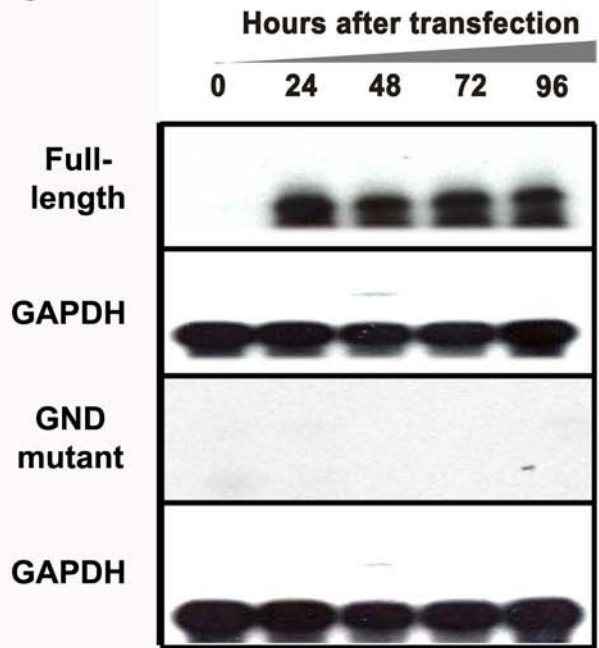

Supplement: MOESM3 [file 9609148]
